# Supplementary material for: Shape and size mimicry in the design of ternary molecular solids: towards a robust strategy for crystal engineering
Source: Royal Society of Chemistry journal article supplement (doi:10.1039/c1cc14567c), 2011-01-01
Supplement: c1cc14567c.pdf [file c1cc14567c.pdf]

## **Shape and size mimicry in the design of ternary molecular solids: Towards a robust strategy for crystal engineering**

Srinu Tothadi, Arijit Mukherjee and Gautam R. Desiraju

Solid State and Structural Chemistry Unit, Indian Institute of Science, Bangalore, India

Fax: +91 80 23602306; Tel: +91 80 22933311; E-mail: desiraju@sscu.iisc.ernet.in

### Supplementary Information

| Contents                         | Page no |
|----------------------------------|---------|
| 1. Experimental details          | 2       |
| 2. Crystallographic information. | 5       |
| 3. ORTEP diagrams.               | 8       |

## Experimental Section

### Single crystal X-ray diffraction

Single crystal X-ray data for all crystals were collected on a Rigaku Mercury375/M CCD (XtaLAB mini) diffractometer using graphite monochromated Mo-K $\alpha$  radiation at 150 K and the data were processed with Rigaku Crystal clear software<sup>1</sup>. Structure solution and refinement were performed using SHELX-97<sup>2</sup> using the WinGX suite<sup>3</sup>. Refinement of coordinates and anisotropic thermal parameters of non-hydrogen atoms were carried out by the full-matrix least-squares method. Mercury version 2.3 was used for molecular representations and packing diagrams.

1. CrystalClear 2.0, Rigaku Corporation, Tokyo, Japan.
2. G. M. Sheldrick, SHELXTL V5.1; Madison, WI, 1998.
3. L. J. Farrugia, *J. Appl. Crystallogr.* 1999, **32**, 837–838.

### Crystallization

*Orcinol* : 4,4'-bipyridine (**1**). Both the compounds were taken in 1:1 ratio and ground together in a mortar and with a pestle for ten minutes. Then the powder obtained was dissolved in MeOH. Crystals were obtained by slow evaporation of solvent after 2-3 days. The same co-crystal was obtained when orcinol and 4,4'-bipyridine were taken in 1: 2 ratios and ground in a mortar. In that case crystal was obtained from 1,4-dioxane by slow evaporation.

*Orcinol* : 4,4'-bipyridine (**2**). An equimolar mixture of orcinol and 4,4'-bipyridine was ground with 2-3 drops of EtOH (solvent drop grinding). The ground sample was dissolved in a minimum amount of MeCN and crystals of the 2:3 cocrystal, suitable for X-ray diffraction, were obtained after four days.

*2-Methylresorcinol : 4,4'-bipyridine (3)*. An equimolar mixture of 2-methylresorcinol and 4,4'-bipyridine were ground with 2-3 drops of EtOH. The ground sample was dissolved in the minimum amount of 1:1 DMSO–CHCl<sub>3</sub> and crystals of the 2:3 compound, suitable for X-ray diffraction, were obtained after five days.

*Orcinol : 4,4'-bipyridine: phenazine (4)*. Orcinol, 4,4'-bipyridine and phenazine were taken in 2:2:1 ratio and ground in a mortar after addition of few drops of MeOH by solvent drop grinding method. The powder obtained was then dissolved in a series of solvents. Yellow colored crystals were obtained from MeOH after three days.

*Orcinol : 4,4'-bipyridine : acridine (5)*. Orcinol, 4,4'-bipyridine and acridine were taken in 2:2:1 ratio and ground in a mortar after addition of few drops of MeOH. The powder obtained was then dissolved in a series of solvents. Pale yellow colored crystals were obtained from MeCN and MeOH after 3 days.

*Orcinol : 4,4'-bipyridine : anthracene (6)*. Orcinol, 4,4'-bipyridine and acridine were taken in 2:2:1 ratio and ground in a mortar after addition of few drops of MeOH. The powder obtained was then dissolved in a series of solvents. Crystals were obtained from THF after 3 days by slow evaporation of solvent.

*Orcinol : 4,4'-bipyridine : 2,2'-bithiophene (7)*. A 2:2:1 molar mixture of orcinol, 4,4'-bipyridine and 2,2'-bithiophene were ground with 2-3 drops of EtOH. Then the ground sample was dissolved in a minimum amount of <sup>i</sup>PrOH and crystals of the 2:2:1 compound, suitable for X-ray diffraction, were obtained after four days.

*2-Methylresorcinol : 4,4'-bipyridine : biphenyl (8)*. 2:2:1 Molar equivalents of 2-methylresorcinol, 4,4'-bipyridine and biphenyl were ground with 2-3 drops of EtOH. Then the ground sample was dissolved in a minimum amount of 1,4-dioxane and crystals of the 2:2:1 compound, suitable for X-ray diffraction, were obtained after seven days.

*2-Methylresorcinol : 4,4'-bipyridine : biphenyl (9)*. 2:1:1 Molar equivalents of 2-methylresorcinol, 4,4'-bipyridine and biphenyl were ground with 2-3 drops of EtOH. The ground sample was dissolved in a minimum amount of 1,4-dioxane and crystals of the 2:1:1, compound, suitable for X-ray diffraction, were obtained after six days.

*2-Methylresorcinol : 4,4'-bipyridine : 2,2'-bithiophene (10)*. A 2:2:1 mixture of 2-methylresorcinol, 4,4'-bipyridine and 2,2'-bithiophene was ground with 2-3 drops of EtOH. Then the ground sample was dissolved in a minimum amount of *i*PrOH and crystals of the 2:2:1 ternary compound, suitable for X-ray diffraction, were obtained after 4 days.

*2-Methylresorcinol : 4,4'-bipyridine : 2,2'-bithiophene (11)*. 2:1:1 Molar equivalents of 2-methylresorcinol, 4,4'-bipyridine and 2,2'-bithiophene were ground with a few drops of EtOH. The ground sample was dissolved in a minimum amount of MeCN and crystals of the 2:1:1 compound, suitable for X-ray diffraction, were obtained after 3 days.

*2-Methylresorcinol : 4,4'-bipyridine : pyrene (12)*. A 2:2:1 mixture of 2-methylresorcinol, 4,4'-bipyridine and pyrene was ground with 2-3 drops of EtOH. The ground sample was dissolved in a minimum amount of MeOH and crystals of the 4:3:2 compound, suitable for X-ray diffraction, were obtained after 6 days.

*2-Methylresorcinol : 4,4'-bipyridine : phenazine (13)*. 2-Methylresorcinol, 4,4'-bipyridine and phenazine were taken in 2:2:1 ratio and ground in a mortar after addition of a few drops of MeOH. The powder obtained was then dissolved in a series of solvents. Crystals were obtained from THF after 2 days by slow evaporation of the solvent.

## 2. Crystallographic information

|                                              | 1                                                                                                                           | 2                                                                                                                           | 3                                                                                                                           | 4                                                                                                                                                                            | 5                                                                                                                                                              | 6                                                                                                                                                              |
|----------------------------------------------|-----------------------------------------------------------------------------------------------------------------------------|-----------------------------------------------------------------------------------------------------------------------------|-----------------------------------------------------------------------------------------------------------------------------|------------------------------------------------------------------------------------------------------------------------------------------------------------------------------|----------------------------------------------------------------------------------------------------------------------------------------------------------------|----------------------------------------------------------------------------------------------------------------------------------------------------------------|
|                                              | Orcinol : 4,4'-bipyridine                                                                                                   | Orcinol : 4,4'-bipyridine                                                                                                   | 2-Methylresorcinol : 4,4'-bipyridine                                                                                        | Orcinol : 4,4'-bipyridine : phenazine                                                                                                                                        | Orcinol : 4,4'-bipyridine : acridine                                                                                                                           | Orcinol : 4,4'-bipyridine : anthracene                                                                                                                         |
| <i>Formula</i>                               | (C <sub>10</sub> H <sub>8</sub> N <sub>2</sub> ) <sub>3</sub> ·(C <sub>7</sub> H <sub>8</sub> O <sub>2</sub> ) <sub>2</sub> | (C <sub>10</sub> H <sub>8</sub> N <sub>2</sub> ) <sub>3</sub> ·(C <sub>7</sub> H <sub>8</sub> O <sub>2</sub> ) <sub>2</sub> | (C <sub>10</sub> H <sub>8</sub> N <sub>2</sub> ) <sub>3</sub> ·(C <sub>7</sub> H <sub>8</sub> O <sub>2</sub> ) <sub>2</sub> | (C <sub>12</sub> H <sub>8</sub> N <sub>2</sub> )·(C <sub>10</sub> H <sub>8</sub> N <sub>2</sub> ) <sub>2</sub> ·(C <sub>7</sub> H <sub>8</sub> O <sub>2</sub> ) <sub>2</sub> | (C <sub>13</sub> H <sub>9</sub> N)·(C <sub>10</sub> H <sub>8</sub> N <sub>2</sub> ) <sub>2</sub> ·(C <sub>7</sub> H <sub>8</sub> O <sub>2</sub> ) <sub>2</sub> | (C <sub>14</sub> H <sub>10</sub> )·(C <sub>10</sub> H <sub>8</sub> N <sub>2</sub> ) <sub>2</sub> ·(C <sub>7</sub> H <sub>8</sub> O <sub>2</sub> ) <sub>2</sub> |
| <i>Formula weight</i>                        | 716.82                                                                                                                      | 716.82                                                                                                                      | 716.82                                                                                                                      | 740.84                                                                                                                                                                       | 739.85                                                                                                                                                         | 738.86                                                                                                                                                         |
| <i>Crystal System</i>                        | Triclinic                                                                                                                   | Orthorhombic                                                                                                                | Triclinic                                                                                                                   | Triclinic                                                                                                                                                                    | Triclinic                                                                                                                                                      | Triclinic                                                                                                                                                      |
| <i>Space group</i>                           | <i>P</i> $\bar{1}$                                                                                                          | <i>Pbca</i>                                                                                                                 | <i>P</i> $\bar{1}$                                                                                                          | <i>P</i> $\bar{1}$                                                                                                                                                           | <i>P</i> $\bar{1}$                                                                                                                                             | <i>P</i> $\bar{1}$                                                                                                                                             |
| <i>a</i> (Å)                                 | 8.8290(18)                                                                                                                  | 9.346(6)                                                                                                                    | 7.4790(15)                                                                                                                  | 9.4283(10)                                                                                                                                                                   | 9.3265(7)                                                                                                                                                      | 9.2102(9)                                                                                                                                                      |
| <i>b</i> (Å)                                 | 10.079(2)                                                                                                                   | 23.250(15)                                                                                                                  | 14.911(3)                                                                                                                   | 10.1821(10)                                                                                                                                                                  | 10.3739(8)                                                                                                                                                     | 10.4824(11)                                                                                                                                                    |
| <i>c</i> (Å)                                 | 12.092(2)                                                                                                                   | 33.59(2)                                                                                                                    | 18.243(4)                                                                                                                   | 11.1549(11)                                                                                                                                                                  | 11.1923(8)                                                                                                                                                     | 11.2645(11)                                                                                                                                                    |
| <i>α</i> (°)                                 | 67.68(3)                                                                                                                    | 90                                                                                                                          | 110.11(3)                                                                                                                   | 69.876(5)                                                                                                                                                                    | 68.503(5)                                                                                                                                                      | 68.340(5)                                                                                                                                                      |
| <i>β</i> (°)                                 | 77.45(3)                                                                                                                    | 90                                                                                                                          | 90.79(3)                                                                                                                    | 86.613(6)                                                                                                                                                                    | 86.581(6)                                                                                                                                                      | 88.208(6)                                                                                                                                                      |
| <i>γ</i> (°)                                 | 69.16(3)                                                                                                                    | 90                                                                                                                          | 102.61(3)                                                                                                                   | 69.427(5)                                                                                                                                                                    | 69.849(5)                                                                                                                                                      | 70.827(5)                                                                                                                                                      |
| <i>V</i> (Å <sup>3</sup> )                   | 926.1(4)                                                                                                                    | 7299(8)                                                                                                                     | 1855.6(7)                                                                                                                   | 939.04(17)                                                                                                                                                                   | 943.12(13)                                                                                                                                                     | 949.65(17)                                                                                                                                                     |
| <i>Z</i>                                     | 1                                                                                                                           | 8                                                                                                                           | 2                                                                                                                           | 1                                                                                                                                                                            | 1                                                                                                                                                              | 1                                                                                                                                                              |
| <i>ρ<sub>calc</sub></i> (gcm <sup>-3</sup> ) | 1.285                                                                                                                       | 1.305                                                                                                                       | 1.283                                                                                                                       | 1.310                                                                                                                                                                        | 1.304                                                                                                                                                          | 1.292                                                                                                                                                          |
| <i>F</i> (000)                               | 378                                                                                                                         | 3024                                                                                                                        | 756                                                                                                                         | 390                                                                                                                                                                          | 390                                                                                                                                                            | 390                                                                                                                                                            |
| <i>μ</i> (mm)                                | 0.084                                                                                                                       | 0.085                                                                                                                       | 0.084                                                                                                                       | 0.085                                                                                                                                                                        | 0.085                                                                                                                                                          | 0.083                                                                                                                                                          |
| <i>Temp</i> (K)                              | 150                                                                                                                         | 150(2)                                                                                                                      | 150 (2)                                                                                                                     | 150                                                                                                                                                                          | 150                                                                                                                                                            | 150                                                                                                                                                            |
| <i>Total ref.</i>                            | 9829                                                                                                                        | 55276                                                                                                                       | 19860                                                                                                                       | 9968                                                                                                                                                                         | 10093                                                                                                                                                          | 10154                                                                                                                                                          |
| <i>Unique ref.</i>                           | 4209                                                                                                                        | 8337                                                                                                                        | 8511                                                                                                                        | 4305                                                                                                                                                                         | 4319                                                                                                                                                           | 4345                                                                                                                                                           |
| <i>Observed ref. (I &gt; 2σ(I))</i>          | 2926                                                                                                                        | 6722                                                                                                                        | 5557                                                                                                                        | 3306                                                                                                                                                                         | 3679                                                                                                                                                           | 3653                                                                                                                                                           |
| <i>R</i>                                     | 0.0653                                                                                                                      | 0.0996                                                                                                                      | 0.0736                                                                                                                      | 0.0510                                                                                                                                                                       | 0.0509                                                                                                                                                         | 0.0427                                                                                                                                                         |
| <i>wR2</i>                                   | 0.2191                                                                                                                      | 0.2708                                                                                                                      | 0.2365                                                                                                                      | 0.1291                                                                                                                                                                       | 0.1471                                                                                                                                                         | 0.1188                                                                                                                                                         |
| <i>S</i>                                     | 1.10                                                                                                                        | 1.186                                                                                                                       | 1.046                                                                                                                       | 1.04                                                                                                                                                                         | 1.08                                                                                                                                                           | 1.07                                                                                                                                                           |
| <i>CCDC No.</i>                              | 836446                                                                                                                      | 836451                                                                                                                      | 836442                                                                                                                      | 836450                                                                                                                                                                       | 836448                                                                                                                                                         | 836449                                                                                                                                                         |

|                                                   | 7                                                                                                                                                               | 8                                                                                                                                                              | 9                                                                                                                                                | 10                                                                                                                                                              | 11                                                                                                                                                             | 12                                                                                                                                                                           | 13                                                                                                                                                             |
|---------------------------------------------------|-----------------------------------------------------------------------------------------------------------------------------------------------------------------|----------------------------------------------------------------------------------------------------------------------------------------------------------------|--------------------------------------------------------------------------------------------------------------------------------------------------|-----------------------------------------------------------------------------------------------------------------------------------------------------------------|----------------------------------------------------------------------------------------------------------------------------------------------------------------|------------------------------------------------------------------------------------------------------------------------------------------------------------------------------|----------------------------------------------------------------------------------------------------------------------------------------------------------------|
|                                                   | Orcinol : 4,4'-bipyridine : 2,2'-bithiophene                                                                                                                    | 2-Methylresorcinol : 4,4'-bipyridine : biphenyl                                                                                                                | 2-Methylresorcinol : 4,4'-bipyridine : biphenyl                                                                                                  | 2-Methylresorcinol : 4,4'-bipyridine : 2,2'-bithiophene                                                                                                         | 2-Methylresorcinol : 4,4'-bipyridine : 2,2'-bithiophene                                                                                                        | 2-Methylresorcinol : 4,4'-bipyridine : pyrene                                                                                                                                | 2-Methylresorcinol : 4,4'-bipyridine : phenazine                                                                                                               |
| <b>Formula</b>                                    | (C <sub>10</sub> H <sub>8</sub> N <sub>2</sub> )·(C <sub>7</sub> H <sub>8</sub> O <sub>2</sub> )·(C <sub>8</sub> H <sub>6</sub> S <sub>2</sub> ) <sub>0.5</sub> | (C <sub>12</sub> H <sub>10</sub> )·(C <sub>10</sub> H <sub>8</sub> N <sub>2</sub> ) <sub>2</sub> ·(C <sub>7</sub> H <sub>8</sub> O <sub>2</sub> ) <sub>2</sub> | (C <sub>12</sub> H <sub>10</sub> )·(C <sub>10</sub> H <sub>8</sub> N <sub>2</sub> )·(C <sub>7</sub> H <sub>8</sub> O <sub>2</sub> ) <sub>2</sub> | (C <sub>10</sub> H <sub>8</sub> N <sub>2</sub> )·(C <sub>7</sub> H <sub>8</sub> O <sub>2</sub> )·(C <sub>8</sub> H <sub>4</sub> S <sub>2</sub> ) <sub>0.5</sub> | (C <sub>10</sub> H <sub>8</sub> N <sub>2</sub> )·(C <sub>7</sub> H <sub>8</sub> O <sub>2</sub> ) <sub>2</sub> ·(C <sub>8</sub> H <sub>4</sub> S <sub>2</sub> ) | (C <sub>16</sub> H <sub>10</sub> ) <sub>2</sub> ·(C <sub>10</sub> H <sub>8</sub> N <sub>2</sub> ) <sub>3</sub> ·(C <sub>7</sub> H <sub>8</sub> O <sub>2</sub> ) <sub>4</sub> | (C <sub>12</sub> H <sub>8</sub> N <sub>2</sub> )·(C <sub>10</sub> H <sub>8</sub> N <sub>2</sub> )·(C <sub>7</sub> H <sub>8</sub> O <sub>2</sub> ) <sub>2</sub> |
| <b>Formula weight</b>                             | 363.45                                                                                                                                                          | 714.84                                                                                                                                                         | 558.65                                                                                                                                           | 362.44                                                                                                                                                          | 570.72                                                                                                                                                         | 1241.40                                                                                                                                                                      | 584.66                                                                                                                                                         |
| <b>Crystal System</b>                             | Monoclinic                                                                                                                                                      | Monoclinic                                                                                                                                                     | Monoclinic                                                                                                                                       | Triclinic                                                                                                                                                       | Monoclinic                                                                                                                                                     | Triclinic                                                                                                                                                                    | Monoclinic                                                                                                                                                     |
| <b>Space group</b>                                | <i>P</i> 2 <sub>1</sub> / <i>c</i>                                                                                                                              | <i>C</i> 2/ <i>c</i>                                                                                                                                           | <i>P</i> 2 <sub>1</sub>                                                                                                                          | <i>P</i> $\bar{1}$                                                                                                                                              | <i>P</i> 2 <sub>1</sub> / <i>c</i>                                                                                                                             | <i>P</i> $\bar{1}$                                                                                                                                                           | <i>P</i> 2 <sub>1</sub> / <i>c</i>                                                                                                                             |
| <b><i>a</i> (Å)</b>                               | 9.3357(12)                                                                                                                                                      | 26.380(5)                                                                                                                                                      | 7.737(4)                                                                                                                                         | 7.4470(15)                                                                                                                                                      | 7.827(6)                                                                                                                                                       | 7.509(6)                                                                                                                                                                     | 7.6576(9)                                                                                                                                                      |
| <b><i>b</i> (Å)</b>                               | 12.3050(14)                                                                                                                                                     | 7.5320(15)                                                                                                                                                     | 19.791(10)                                                                                                                                       | 9.4240(19)                                                                                                                                                      | 18.987(14)                                                                                                                                                     | 8.755(6)                                                                                                                                                                     | 19.710(2)                                                                                                                                                      |
| <b><i>c</i> (Å)</b>                               | 17.910(2)                                                                                                                                                       | 19.030(4)                                                                                                                                                      | 9.508(5)                                                                                                                                         | 14.075(3)                                                                                                                                                       | 11.956(6)                                                                                                                                                      | 24.70(2)                                                                                                                                                                     | 11.6365(12)                                                                                                                                                    |
| <b><i>α</i> (°)</b>                               | 90                                                                                                                                                              | 90                                                                                                                                                             | 90                                                                                                                                               | 72.08(3)                                                                                                                                                        | 90                                                                                                                                                             | 91.768(12)                                                                                                                                                                   | 90                                                                                                                                                             |
| <b><i>β</i> (°)</b>                               | 116.558(7)                                                                                                                                                      | 101.93(3)                                                                                                                                                      | 95.170(7)                                                                                                                                        | 76.66(3)                                                                                                                                                        | 126.99(3)                                                                                                                                                      | 96.793(14)                                                                                                                                                                   | 125.572(7)                                                                                                                                                     |
| <b><i>γ</i> (°)</b>                               | 90                                                                                                                                                              | 90                                                                                                                                                             | 90                                                                                                                                               | 89.64(3)                                                                                                                                                        | 90                                                                                                                                                             | 93.035(13)                                                                                                                                                                   | 90                                                                                                                                                             |
| <b><i>V</i> (Å<sup>3</sup>)</b>                   | 1840.3(4)                                                                                                                                                       | 3699.5(13)                                                                                                                                                     | 1450.0(13)                                                                                                                                       | 912.3(4)                                                                                                                                                        | 1419.2(18)                                                                                                                                                     | 1609(2)                                                                                                                                                                      | 1428.6(3)                                                                                                                                                      |
| <b><i>Z</i></b>                                   | 4                                                                                                                                                               | 4                                                                                                                                                              | 2                                                                                                                                                | 2                                                                                                                                                               | 2                                                                                                                                                              | 1                                                                                                                                                                            | 2                                                                                                                                                              |
| <b><i>ρ</i><sub>calc</sub> (gcm<sup>-3</sup>)</b> | 1.312                                                                                                                                                           | 1.283                                                                                                                                                          | 1.280                                                                                                                                            | 1.319                                                                                                                                                           | 1.336                                                                                                                                                          | 1.281                                                                                                                                                                        | 1.359                                                                                                                                                          |
| <b><i>F</i>(000)</b>                              | 764                                                                                                                                                             | 1512                                                                                                                                                           | 592                                                                                                                                              | 380                                                                                                                                                             | 600                                                                                                                                                            | 652                                                                                                                                                                          | 616                                                                                                                                                            |
| <b><i>μ</i>(mm)</b>                               | 0.193                                                                                                                                                           | 0.083                                                                                                                                                          | 0.083                                                                                                                                            | 0.195                                                                                                                                                           | 0.228                                                                                                                                                          | 0.081                                                                                                                                                                        | 0.090                                                                                                                                                          |
| <b>Temp(K)</b>                                    | 150(2)                                                                                                                                                          | 150 (2)                                                                                                                                                        | 150 (2)                                                                                                                                          | 150 (2)                                                                                                                                                         | 150 (2)                                                                                                                                                        | 150 (2)                                                                                                                                                                      | 150                                                                                                                                                            |
| <b>Total ref.</b>                                 | 19129                                                                                                                                                           | 18432                                                                                                                                                          | 15099                                                                                                                                            | 9717                                                                                                                                                            | 14493                                                                                                                                                          | 17140                                                                                                                                                                        | 14793                                                                                                                                                          |
| <b>Unique ref.</b>                                | 4212                                                                                                                                                            | 4281                                                                                                                                                           | 6630                                                                                                                                             | 4166                                                                                                                                                            | 3250                                                                                                                                                           | 7370                                                                                                                                                                         | 3280                                                                                                                                                           |
| <b>Observed ref. (<i>I</i> &gt; 2σ(<i>I</i>))</b> | 3744                                                                                                                                                            | 2962                                                                                                                                                           | 6082                                                                                                                                             | 3373                                                                                                                                                            | 2807                                                                                                                                                           | 4555                                                                                                                                                                         | 2732                                                                                                                                                           |
| <b><i>R</i></b>                                   | 0.0579                                                                                                                                                          | 0.0878                                                                                                                                                         | 0.0570                                                                                                                                           | 0.0605                                                                                                                                                          | 0.0543                                                                                                                                                         | 0.0677                                                                                                                                                                       | 0.0420                                                                                                                                                         |
| <b><i>wR</i>2</b>                                 | 0.1682                                                                                                                                                          | 0.2559                                                                                                                                                         | 0.1620                                                                                                                                           | 0.2001                                                                                                                                                          | 0.1730                                                                                                                                                         | 0.2283                                                                                                                                                                       | 0.1023                                                                                                                                                         |
| <b><i>S</i></b>                                   | 1.067                                                                                                                                                           | 1.169                                                                                                                                                          | 1.054                                                                                                                                            | 1.107                                                                                                                                                           | 1.053                                                                                                                                                          | 1.079                                                                                                                                                                        | 1.05                                                                                                                                                           |
| <b>CCDC No.</b>                                   | 836452                                                                                                                                                          | 836443                                                                                                                                                         | 836592                                                                                                                                           | 836441                                                                                                                                                          | 836445                                                                                                                                                         | 836444                                                                                                                                                                       | 836447                                                                                                                                                         |

**3. ORTEP Diagrams (only the asymmetric unit is shown)**

|                                                                                     |                                                                                     |                                                                                       |
|-------------------------------------------------------------------------------------|-------------------------------------------------------------------------------------|---------------------------------------------------------------------------------------|
| 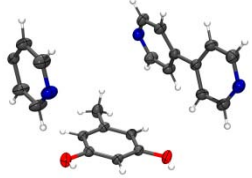   |    |    |
| <p>Orcinol : 4,4'-bipyridine <b>(1)</b></p>                                         | <p>Orcinol : 4,4'-bipyridine <b>(2)</b></p>                                         | <p>2-Methylresorcinol : 4,4'-bipyridine <b>(3)</b></p>                                |
|   |   |   |
| <p>Orcinol : 4,4'-bipyridine : phenazine <b>(4)</b></p>                             | <p>Orcinol : 4,4'-bipyridine : acridine <b>(5)</b></p>                              | <p>Orcinol : 4,4'-bipyridine : anthracene <b>(6)</b></p>                              |
|  |  |  |
| <p>Orcinol : 4,4'-bipyridine : 2,2'-bithiophene <b>(7)</b></p>                      | <p>2-Methylresorcinol : 4,4'-bipyridine : biphenyl <b>(8)</b></p>                   | <p>2-Methylresorcinol : 4,4'-bipyridine : biphenyl <b>(9)</b></p>                     |

|                                                                                     |                                                                                     |                                                                                     |
|-------------------------------------------------------------------------------------|-------------------------------------------------------------------------------------|-------------------------------------------------------------------------------------|
| 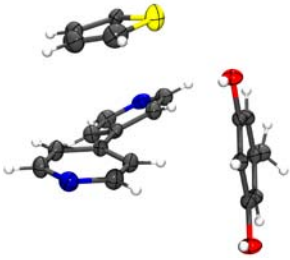   |    |  |
| <p>2-Methylresorcinol : 4,4'-<br/>bipyridine : 2,2'-bithiophene<br/><b>(10)</b></p> | <p>2-Methylresorcinol : 4,4'-<br/>bipyridine : 2,2'-bithiophene<br/><b>(11)</b></p> | <p>2-Methylresorcinol : 4,4'-<br/>bipyridine : pyrene <b>(12)</b></p>               |
|    |                                                                                     |                                                                                     |
| <p>2-Methylresorcinol : 4,4'-<br/>bipyridine : phenazine <b>(13)</b></p>            |                                                                                     |                                                                                     |
